# Supplementary material for: The Lambda Variant in Argentina: Analyzing the Evolution and Spread of SARS-CoV-2 Lineage C.37
Source: MDPI journal article supplement (doi:10.3390/v15061382), 2023-06-16
Supplement: s1 [file s1]

Table S1. Frequency of cases classified as VOC/VOI by epidemiological week (EW) in Argentina<sup>1</sup>.

| EW            | Alpha    |                     |       | Gamma    |                     |       | Lambda   |                     |       | Delta    |                     |       | Omicron BA.1 |                     | Omicron BA.2 |          | Omicron BA.4/BA.5   |       | Mu       |                     | non VOC/VOI |          |                     |       |      |
|---------------|----------|---------------------|-------|----------|---------------------|-------|----------|---------------------|-------|----------|---------------------|-------|--------------|---------------------|--------------|----------|---------------------|-------|----------|---------------------|-------------|----------|---------------------|-------|------|
|               | Freq (%) | 95% CI <sup>2</sup> |       | Freq (%) | 95% CI <sup>2</sup> |       | Freq (%) | 95% CI <sup>2</sup> |       | Freq (%) | 95% CI <sup>2</sup> |       | Freq (%)     | 95% CI <sup>2</sup> |              | Freq (%) | 95% CI <sup>2</sup> |       | Freq (%) | 95% CI <sup>2</sup> |             | Freq (%) | 95% CI <sup>2</sup> |       |      |
| until 53/2020 |          |                     |       |          |                     |       |          |                     |       |          |                     |       |              |                     |              |          |                     |       |          |                     | 100.00      | 100.00   | 99.07               |       |      |
| 1-2/2021      |          |                     |       |          |                     |       |          |                     |       |          |                     |       |              |                     |              |          |                     |       |          |                     | 100.00      | 100.00   | 98.23               |       |      |
| 3-4/2021      |          |                     |       |          |                     |       | 2.00     | 7.00                | 0.36  |          |                     |       |              |                     |              |          |                     |       |          |                     | 98.00       | 99.64    | 93.00               |       |      |
| 5-6/2021      | 1.61     | 5.69                | 0.29  | 1.61     | 5.69                | 0.29  | 1.61     | 5.69                | 0.29  |          |                     |       |              |                     |              |          |                     |       |          |                     | 95.16       | 97.76    | 89.84               |       |      |
| 7-8/2021      |          |                     |       | 1.40     | 4.96                | 0.25  | 2.10     | 5.99                | 0.57  |          |                     |       |              |                     |              |          |                     |       |          |                     | 96.50       | 98.50    | 92.08               |       |      |
| 9-10/2021     | 6.61     | 10.34               | 4.17  | 4.67     | 7.98                | 2.69  | 8.56     | 12.62               | 5.72  | 0.39     | 2.17                | 0.02  |              |                     |              |          |                     |       |          |                     | 79.77       | 84.22    | 74.43               |       |      |
| 11-12/2021    | 15.51    | 20.02               | 11.87 | 10.23    | 14.16               | 7.30  | 12.87    | 17.11               | 9.56  |          |                     |       |              |                     |              |          |                     |       |          |                     | 61.39       | 66.69    | 55.79               |       |      |
| 13-14/2021    | 8.97     | 12.33               | 6.46  | 29.89    | 34.76               | 25.44 | 27.99    | 32.79               | 23.65 |          |                     |       |              |                     |              |          |                     |       |          |                     | 33.15       | 38.11    | 28.54               |       |      |
| 15-16/2021    | 16.78    | 20.58               | 13.56 | 37.47    | 42.11               | 33.05 | 28.28    | 32.68               | 24.25 |          |                     |       |              |                     |              |          |                     |       |          |                     | 17.47       | 21.32    | 14.19               |       |      |
| 17-18/2021    | 8.89     | 12.89               | 6.05  | 45.56    | 51.52               | 39.72 | 31.11    | 36.87               | 25.89 |          |                     |       |              |                     |              |          |                     |       | 0.37     | 2.07                | 0.02        | 14.07    | 18.73               | 10.43 |      |
| 19-20/2021    | 11.47    | 15.09               | 8.63  | 57.87    | 62.76               | 52.81 | 23.47    | 28.01               | 19.46 |          |                     |       |              |                     |              |          |                     |       |          |                     | 7.20        | 10.27    | 5.00                |       |      |
| 21-22/2021    | 8.63     | 11.92               | 6.18  | 62.53    | 67.31               | 57.50 | 23.99    | 28.59               | 19.92 |          |                     |       |              |                     |              |          |                     |       |          |                     | 4.85        | 7.54     | 3.09                |       |      |
| 23-24/2021    | 7.34     | 10.69               | 4.98  | 68.50    | 73.30               | 63.28 | 22.32    | 27.14               | 18.15 |          |                     |       |              |                     |              |          |                     |       |          |                     | 1.83        | 3.94     | 0.84                |       |      |
| 25-26/2021    | 7.42     | 10.89               | 4.99  | 64.84    | 69.94               | 59.37 | 26.45    | 31.63               | 21.85 |          |                     |       |              |                     |              |          |                     |       |          |                     | 1.29        | 3.27     | 0.50                |       |      |
| 27-28/2021    | 5.17     | 8.12                | 3.25  | 67.48    | 72.31               | 62.24 | 25.53    | 30.51               | 21.12 | 0.30     | 1.70                | 0.02  |              |                     |              |          |                     |       | 0.30     | 1.70                | 0.02        | 1.22     | 3.08                | 0.47  |      |
| 29-30/2021    | 5.40     | 8.71                | 3.30  | 66.55    | 71.83               | 60.81 | 24.46    | 29.84               | 19.78 | 1.44     | 3.64                | 0.56  |              |                     |              |          |                     |       | 0.72     | 2.58                | 0.13        | 1.44     | 3.64                | 0.56  |      |
| 31-32/2021    | 2.01     | 4.08                | 0.97  | 70.49    | 75.03               | 65.50 | 23.21    | 27.92               | 19.09 | 2.87     | 5.19                | 1.56  |              |                     |              |          |                     |       | 0.29     | 1.60                | 0.01        | 1.15     | 2.91                | 0.45  |      |
| 33-34/2021    | 3.17     | 5.91                | 1.68  | 67.25    | 72.45               | 61.60 | 22.89    | 28.12               | 18.38 | 5.63     | 8.95                | 3.50  |              |                     |              |          |                     |       | 0.35     | 1.97                | 0.02        | 0.70     | 2.53                | 0.13  |      |
| 35-36/2021    | 2.63     | 5.33                | 1.28  | 61.28    | 66.93               | 55.30 | 21.80    | 27.15               | 17.26 | 13.53    | 18.17               | 9.94  |              |                     |              |          |                     |       | 0.75     | 2.70                | 0.13        |          |                     |       |      |
| 37-38/2021    | 1.23     | 4.39                | 0.22  | 49.38    | 57.01               | 41.79 | 17.28    | 23.85               | 12.24 | 29.63    | 37.07               | 23.14 |              |                     |              |          |                     |       | 1.23     | 4.39                | 0.22        | 1.23     | 4.39                | 0.22  |      |
| 39-40/2021    | 0.68     | 3.75                | 0.03  | 33.33    | 41.29               | 26.22 | 16.33    | 23.14               | 11.22 | 48.98    | 56.98               | 41.03 |              |                     |              |          |                     |       | 0.68     | 3.75                | 0.03        |          |                     |       |      |
| 41-42/2021    | 3.67     | 6.83                | 1.94  | 17.14    | 22.36               | 12.94 | 17.14    | 22.36               | 12.94 | 61.63    | 67.50               | 55.41 |              |                     |              |          |                     |       |          |                     |             | 0.41     | 2.28                | 0.02  |      |
| 43-44/2021    | 2.02     | 4.65                | 0.87  | 6.48     | 10.26               | 4.03  | 10.53    | 14.98               | 7.29  | 78.54    | 83.20               | 73.01 |              |                     |              |          |                     |       | 1.62     | 4.09                | 0.63        | 0.81     | 2.90                | 0.14  |      |
| 45-46/2021    | 0.33     | 1.85                | 0.02  | 3.31     | 5.99                | 1.81  | 12.91    | 17.17               | 9.59  | 82.78    | 86.62               | 78.12 |              |                     |              |          |                     |       | 0.66     | 2.38                | 0.12        |          |                     |       |      |
| 47-48/2021    |          |                     |       |          |                     |       | 3.35     | 6.46                | 1.71  | 96.65    | 98.29               | 93.54 |              |                     |              |          |                     |       |          |                     |             |          |                     |       |      |
| 49-50/2021    |          |                     |       | 0.24     | 1.37                | 0.01  | 0.98     | 2.49                | 0.38  | 70.42    | 74.63               | 65.82 | 27.63        | 32.15               | 23.52        |          |                     |       |          |                     |             |          | 0.73                | 2.13  | 0.20 |
| 51-52/2021    |          |                     |       |          |                     |       |          |                     |       | 33.33    | 37.50               | 29.41 | 66.67        | 70.59               | 62.50        |          |                     |       |          |                     |             |          |                     |       |      |
| 1-2/2022      |          |                     |       |          |                     |       |          |                     |       | 6.64     | 9.42                | 4.63  | 93.36        | 95.37               | 90.58        |          |                     |       |          |                     |             |          |                     |       |      |
| 3-4/2022      |          |                     |       |          |                     |       | 0.21     | 1.18                | 0.01  | 0.63     | 1.83                | 0.17  | 99.16        | 99.67               | 97.86        |          |                     |       |          |                     |             |          |                     |       |      |
| 5-6/2022      |          |                     |       |          |                     |       |          |                     |       |          |                     |       | 99.52        | 99.98               | 97.33        | 0.48     | 2.67                | 0.02  |          |                     |             |          |                     |       |      |
| 7-8/2022      |          |                     |       |          |                     |       |          |                     |       |          |                     |       | 95.92        | 98.12               | 91.38        | 4.08     | 8.62                | 1.88  |          |                     |             |          |                     |       |      |
| 9-10/2022     |          |                     |       |          |                     |       |          |                     |       |          |                     |       | 93.26        | 96.87               | 86.06        | 6.74     | 13.94               | 3.13  |          |                     |             |          |                     |       |      |
| 11-12/2022    |          |                     |       |          |                     |       |          |                     |       |          |                     |       | 80.00        | 87.92               | 68.73        | 20.00    | 31.27               | 12.08 |          |                     |             |          |                     |       |      |
| 13-14/2022    |          |                     |       |          |                     |       |          |                     |       |          |                     |       | 55.71        | 66.75               | 44.08        | 44.29    | 55.92               | 33.25 |          |                     |             |          |                     |       |      |
| 15-16/2022    |          |                     |       |          |                     |       | 1.59     | 8.46                | 0.08  |          |                     |       | 34.92        | 47.25               | 24.33        | 60.32    | 71.47               | 47.98 | 3.17     | 10.86               | 0.56        |          |                     |       |      |
| 17/2022       |          |                     |       |          |                     |       |          |                     |       |          |                     |       | 16.13        | 32.63               | 7.09         | 83.87    | 92.91               | 67.37 |          |                     |             |          |                     |       |      |

<sup>1</sup>Only the cases that were randomly collected and did not present travel history or close contact with travelers are included; in cases with a known epidemiological link between samples, only one was included to estimate frequencies.

<sup>2</sup>The 95% confidence intervals (95% CI) were estimated with the Wilson / Brown method, implemented in the Graph Pad Prism v.9.2 program (San Diego, California, United States, [www.graphpad.com](http://www.graphpad.com)).
